# Supplementary material for: p53 expression confers sensitivity to 5-fluorouracil via distinct chromatin accessibility dynamics in human colorectal cancer
Source: PubMed Central journal article supplement — Oncol Lett. 2021 Jan 24;21(3):226. doi: 10.3892/ol.2021.12487 (PMC7856692; doi:10.3892/ol.2021.12487), 2021-01-24
Supplement: Supplementary_Data.pdf [file Supplementary_Data.pdf]

Figure S1. TP53 genotyping in HCT116 TP53-WT and HCT116 TP53-KO cell lines. (A) Scheme of genotyping primers for CTCF exon 12 and TP53 exon 2 regions. (B) PCR showing 519 bp amplicon for CTCF exon 12 detected in both TP53-WT and TP53-KO cells, while 220 bp amplicon for TP53 exon 2 detected only in TP53-WT cells.

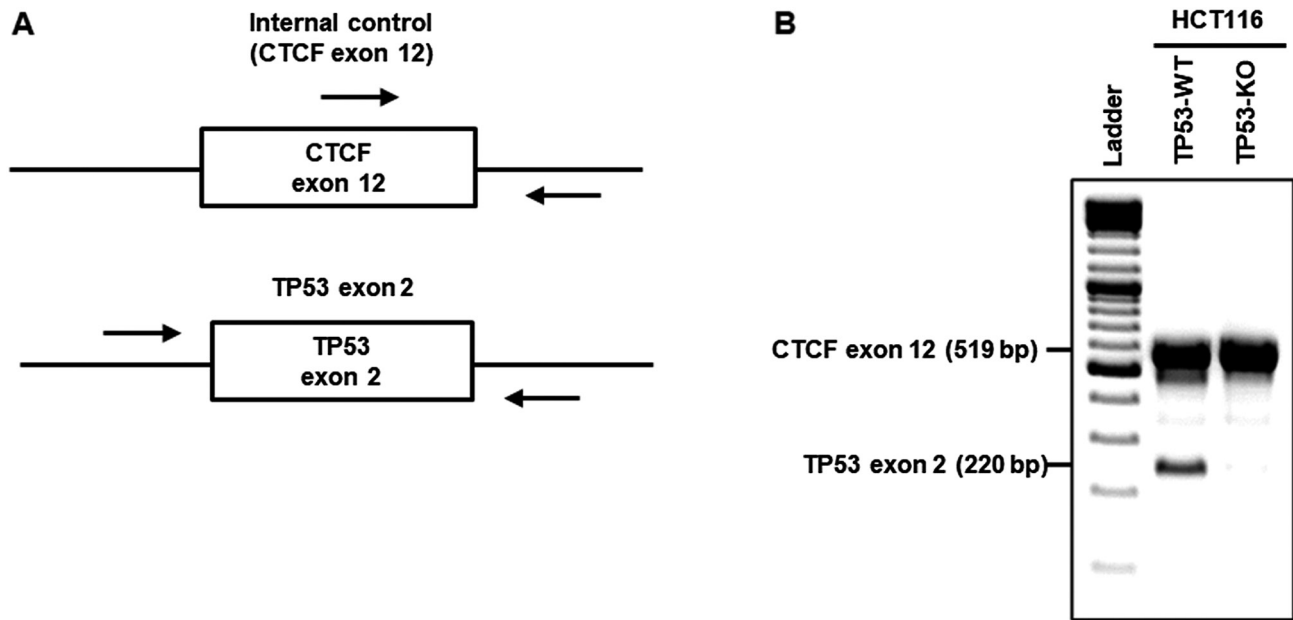

Figure S2. Gene Ontology analysis of 135 genes overlapped among the genes whose expressions and chromatin accessibilities were changed after 5-FU treatment in both TP53-WT and TP53-KO cells.

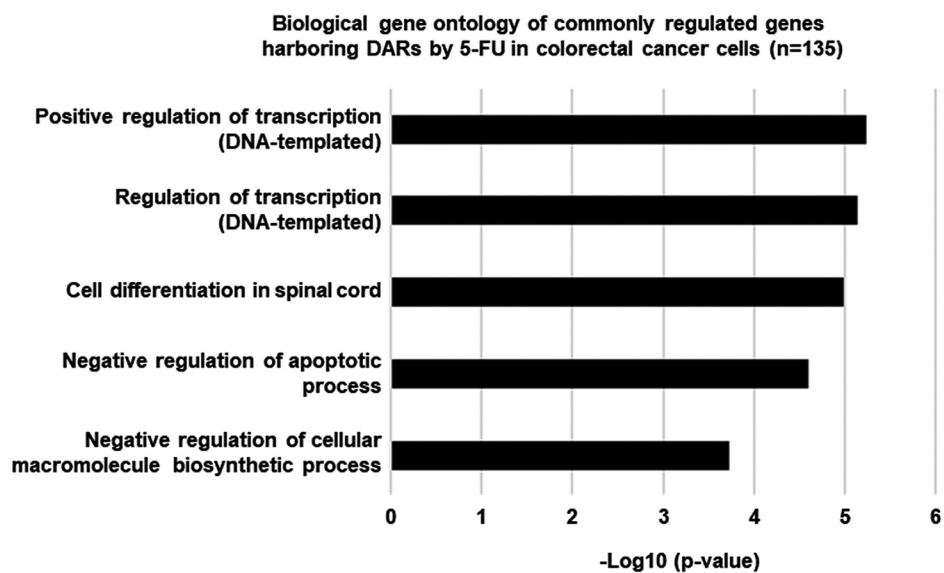

Table SI. List of primers for PCR genotyping.

| Target gene | Primers      | Sequence                             |
|-------------|--------------|--------------------------------------|
| CTCF        | CTCF Forward | 5'-ACTAGTCTAAAAGACCCTTGTGATTCTTGG-3' |
|             | CTCF Reverse | 5'-GGTACCCACTGTCCTCAGCACTTCAC-3'     |
| TP53        | TP53 Forward | 5'-TTGGAAGTGTCTCATGC-3'              |
|             | TP53 Reverse | 5'-TCCCACAGGTCTCTGCTAGG-3'           |

Table SII. List of specifically up-regulated 95 genes in TP53-WT (Adjusted P-value <0.001).

| Gene name | Log2 fold change | Adjusted P-value       |
|-----------|------------------|------------------------|
| TIMP3     | 7.23             | 2.61x10 <sup>-5</sup>  |
| NID1      | 5.73             | 1.39x10 <sup>-2</sup>  |
| KLHDC7A   | 5.65             | 2.47x10 <sup>-5</sup>  |
| ABCA1     | 5.56             | 7.66x10 <sup>-2</sup>  |
| SORCS2    | 5.33             | 2.37x10 <sup>-11</sup> |
| ICAM1     | 4.57             | 2.75x10 <sup>-17</sup> |
| MAST4     | 4.47             | 8.64x10 <sup>-11</sup> |
| SLC1A3    | 4.35             | 2.54x10 <sup>-8</sup>  |
| SH3TC1    | 4.22             | 3.22x10 <sup>-11</sup> |
| SLC5A5    | 4.21             | 1.27x10 <sup>-8</sup>  |
| SYT8      | 4.19             | 1.39x10 <sup>-3</sup>  |
| SULF2     | 4.10             | 2.24x10 <sup>-23</sup> |
| KLHL30    | 3.98             | 6.03x10 <sup>-4</sup>  |
| KCNB1     | 3.97             | 2.99x10 <sup>-3</sup>  |
| GRIN2C    | 3.55             | 7.94x10 <sup>-8</sup>  |
| GDF15     | 3.53             | 6.79x10 <sup>-30</sup> |
| PXDN      | 3.48             | 5.58x10 <sup>-10</sup> |
| PRODH     | 3.26             | 4.33x10 <sup>-6</sup>  |
| SUSD2     | 3.20             | 2.34x10 <sup>-10</sup> |
| DRAXIN    | 2.99             | 6.31x10 <sup>-11</sup> |
| RNF152    | 2.79             | 2.05x10 <sup>-3</sup>  |
| FDXR      | 2.73             | 2.12x10 <sup>-16</sup> |
| LAMP3     | 2.72             | 5.97x10 <sup>-6</sup>  |
| CACNA1A   | 2.62             | 1.10x10 <sup>-3</sup>  |
| NTF4      | 2.55             | 3.24x10 <sup>-2</sup>  |
| CD82      | 2.51             | 1.88x10 <sup>-8</sup>  |
| BIRC3     | 2.49             | 3.19x10 <sup>-5</sup>  |
| ENC1      | 2.46             | 9.54x10 <sup>-8</sup>  |
| PHLDA3    | 2.39             | 2.70x10 <sup>-8</sup>  |
| PLPP3     | 2.33             | 1.60x10 <sup>-2</sup>  |
| SLC26A1   | 2.33             | 3.14x10 <sup>-3</sup>  |
| IKBIP     | 2.28             | 3.74x10 <sup>-4</sup>  |
| CDKN1A    | 2.28             | 4.66x10 <sup>-14</sup> |
| PAG1      | 2.21             | 1.82x10 <sup>-2</sup>  |
| OASL      | 2.16             | 6.55x10 <sup>-4</sup>  |
| SEMA3B    | 2.16             | 3.19x10 <sup>-5</sup>  |
| NUAK2     | 2.15             | 1.10x10 <sup>-4</sup>  |
| GRIN2B    | 2.14             | 8.52x10 <sup>-5</sup>  |
| ADGRG1    | 2.09             | 6.23x10 <sup>-9</sup>  |
| SLC22A17  | 2.08             | 1.92x10 <sup>-3</sup>  |
| STON2     | 2.05             | 2.35x10 <sup>-3</sup>  |
| NINJ1     | 2.04             | 5.97x10 <sup>-6</sup>  |
| SULT1A1   | 2.00             | 1.07x10 <sup>-2</sup>  |
| ABCG4     | 2.00             | 2.00x10 <sup>-3</sup>  |
| BBC3      | 1.98             | 2.69x10 <sup>-4</sup>  |
| RIN1      | 1.95             | 1.28x10 <sup>-5</sup>  |
| CES3      | 1.93             | 2.34x10 <sup>-2</sup>  |
| ATF3      | 1.83             | 1.42x10 <sup>-5</sup>  |
| PTPRU     | 1.81             | 4.25x10 <sup>-6</sup>  |
| PGF       | 1.80             | 5.47x10 <sup>-3</sup>  |
| PLXNB1    | 1.77             | 9.62x10 <sup>-5</sup>  |
| TMEM92    | 1.76             | 4.08x10 <sup>-2</sup>  |
| NTPCR     | 1.74             | 2.08x10 <sup>-3</sup>  |
| AQP3      | 1.73             | 2.82x10 <sup>-3</sup>  |
| TMEM173   | 1.70             | 5.22x10 <sup>-3</sup>  |
| SERPINE1  | 1.67             | 1.56x10 <sup>-4</sup>  |
| P2RY2     | 1.67             | 4.66x10 <sup>-2</sup>  |

Table SII. Continued.

| Gene name | Log2 fold change | Adjusted P-value      |
|-----------|------------------|-----------------------|
| ARAF      | 1.65             | 2.58x10 <sup>-2</sup> |
| PTPRE     | 1.64             | 4.57x10 <sup>-4</sup> |
| CCN1      | 1.63             | 2.36x10 <sup>-3</sup> |
| HSPG2     | 1.63             | 6.36x10 <sup>-4</sup> |
| CASKIN1   | 1.57             | 3.15x10 <sup>-2</sup> |
| IRF1      | 1.57             | 6.21x10 <sup>-3</sup> |
| SLC46A1   | 1.54             | 5.22x10 <sup>-3</sup> |
| ICOSLG    | 1.52             | 1.90x10 <sup>-3</sup> |
| SSTR5     | 1.52             | 2.83x10 <sup>-2</sup> |
| TNS2      | 1.42             | 9.44x10 <sup>-3</sup> |
| TGFBR2    | 1.42             | 3.51x10 <sup>-2</sup> |
| SLC4A11   | 1.41             | 2.32x10 <sup>-2</sup> |
| SLC30A1   | 1.35             | 5.22x10 <sup>-3</sup> |
| CCDC9B    | 1.35             | 3.98x10 <sup>-2</sup> |
| ABCB9     | 1.35             | 2.01x10 <sup>-2</sup> |
| TNFRSF6B  | 1.33             | 4.90x10 <sup>-2</sup> |
| ESPN      | 1.33             | 3.51x10 <sup>-2</sup> |
| KDM4B     | 1.32             | 2.87x10 <sup>-2</sup> |
| NECTIN1   | 1.31             | 3.44x10 <sup>-3</sup> |
| CYP4F11   | 1.30             | 1.09x10 <sup>-2</sup> |
| CASZ1     | 1.29             | 2.82x10 <sup>-2</sup> |
| FADS3     | 1.29             | 5.71x10 <sup>-3</sup> |
| MINK1     | 1.27             | 1.58x10 <sup>-2</sup> |
| TNRC18    | 1.26             | 1.50x10 <sup>-3</sup> |
| LIF       | 1.22             | 1.45x10 <sup>-2</sup> |
| STARD9    | 1.21             | 2.53x10 <sup>-2</sup> |
| NRBP2     | 1.18             | 3.69x10 <sup>-2</sup> |
| CELSR1    | 1.17             | 2.66x10 <sup>-2</sup> |
| ISYNA1    | 1.17             | 1.69x10 <sup>-2</sup> |
| CST3      | 1.13             | 2.83x10 <sup>-2</sup> |
| RHOB      | 1.12             | 2.36x10 <sup>-2</sup> |
| MICALL2   | 1.12             | 2.36x10 <sup>-2</sup> |
| PDLIM5    | 1.12             | 3.39x10 <sup>-2</sup> |
| ABCC2     | 1.11             | 1.65x10 <sup>-2</sup> |
| SLC12A4   | 1.10             | 3.71x10 <sup>-2</sup> |
| TRAK1     | 1.06             | 3.82x10 <sup>-2</sup> |
| AHNAK2    | 1.03             | 2.03x10 <sup>-2</sup> |
| CTSD      | 0.98             | 2.95x10 <sup>-2</sup> |
